# Supplementary material
Source: Research Square preprint supplement (doi:10.21203/rs.3.rs-9691127/v1)
Supplement: Supplementary file 1 [file f1916e8b9920ba9ed3697690.docx]

**Supplementary Information**

The Burden of Chronic Urticaria in Portuguese Patients: A Patient-Reported Observational Study

**Supplementary Table S1. Sociodemographic characterisation of respondents (n = 147).**

| **Characteristic** | **Value (%)** |
| --- | --- |
| **Gender** |  |
| Female | 82.8 |
| Male | 17.2 |
| **Age group** |  |
| Under 25 years | 2.0 |
| 25–34 years | 39.5 |
| 35–44 years | 21.9 |
| 45–54 years | 26.2 |
| 55–64 years | 6.4 |
| 65 years or older | 4.0 |

Percentages are based on the post-stratification weighted sample.
